# Supplementary material for: A genetic approach of wine yeast fermentation capacity in nitrogen-starvation reveals the key role of nitrogen signaling
Source: PubMed Central journal article supplement (PMC4073503; doi:10.1186/1471-2164-15-495), 2014-06-19

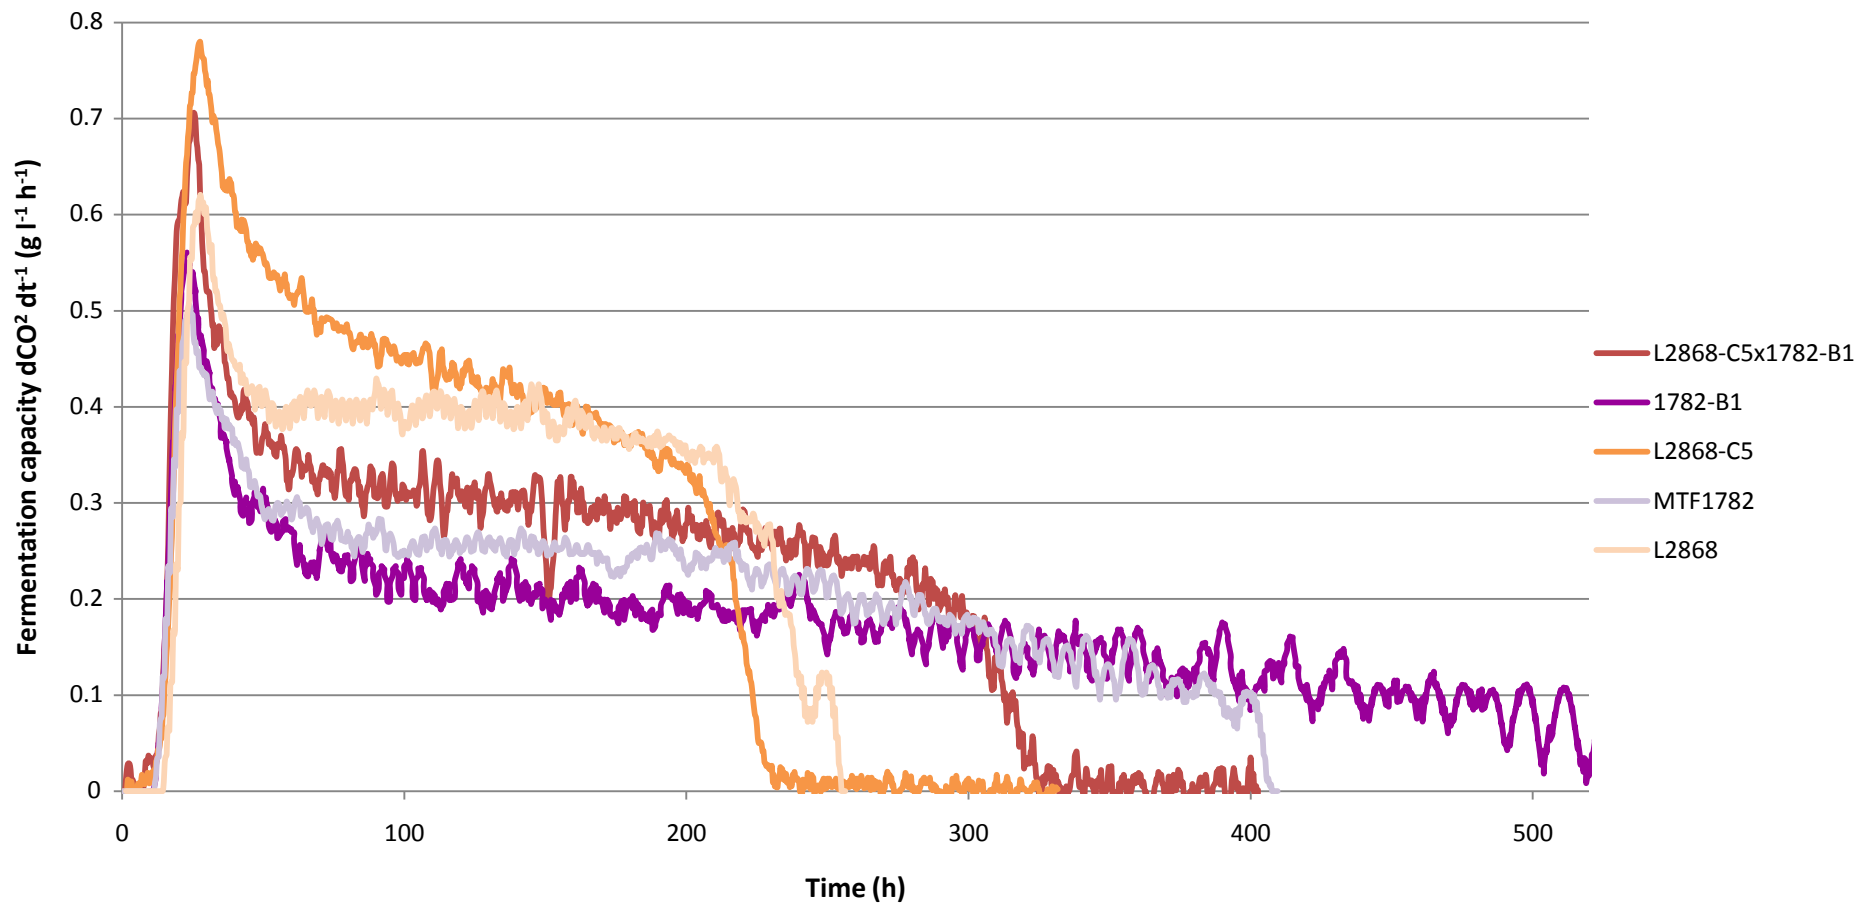

Supplement: 12864_2014_6161_MOESM1_ESM.pdf [file 12864_2014_6161_MOESM1_ESM.pdf]
