# Supplementary material for: A genetic approach of wine yeast fermentation capacity in nitrogen-starvation reveals the key role of nitrogen signaling
Source: PubMed Central journal article supplement (PMC4073503; doi:10.1186/1471-2164-15-495), 2014-06-19
Supplement: 12864_2014_6161_MOESM5_ESM.pdf [file 12864_2014_6161_MOESM5_ESM.pdf]

| <b>Chr</b> | <b>Location (kb)</b> | <b>PCR primers</b> | <b>Primer sequences (5' -&gt; 3')</b>                           |
|------------|----------------------|--------------------|-----------------------------------------------------------------|
| VII        | 124.126              | MDS3delF           | CCAAAGGACAAGTAACAATCTGCACCTGCTTTAGCGTAGTTTCGTACGCTGCAGGTCGAC    |
| VII        |                      | MDS3delR           | TTGTACTACTGGGTGAATAATAATCATCAGTCTTGGTACCCGCATAGGCCACTAGTGGATCTG |
| VII        | 131.182              | GCN1delF           | GTGATGACAGCTATCTTAAACTGGGAAGATATATCCCCTGTTTCGTACGCTGCAGGTCGAC   |
| VII        |                      | GCN1delR           | CGGAGTGCAGAGCTGGTTGCCTCGATAAATAACTGAAGTGCGCATAGGCCACTAGTGGATCTG |
| XIII       | 76.77                | ARG81delF          | CCTTGCGAAAAGCATCTCTTTTAGATTTGATGCTTTAGTGTTTCGTACGCTGCAGGTCGAC   |
| XIII       |                      | ARG81delR          | CTGGTAAAGTTTATCATTGGCACTGGCTGCTTTATTAGGCATAGGCCACTAGTGGATCTG    |
| XIV        | 734.735              | BIO3delF           | GGAGGATGTCAACAGCGCAATTCGTTTTCTATTGCTAGGATTCGTACGCTGCAGGTCGAC    |
| XIV        |                      | BIO3delR           | GAAATAAGAATTCCTTGCAAATGACTTGATGAGATCGGCATAGGCCACTAGTGGATCTG     |
